# Supplementary material
Source: Springer Nature journal article supplement (https://www.springermedizin.de/resource/supplementary/13002_2009_165_MOESM1_ESM.pdf/9627296)

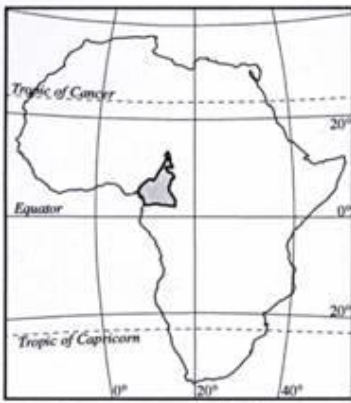

Cameroon in Africa

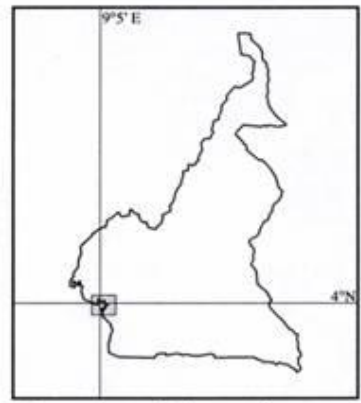

Location of the study area

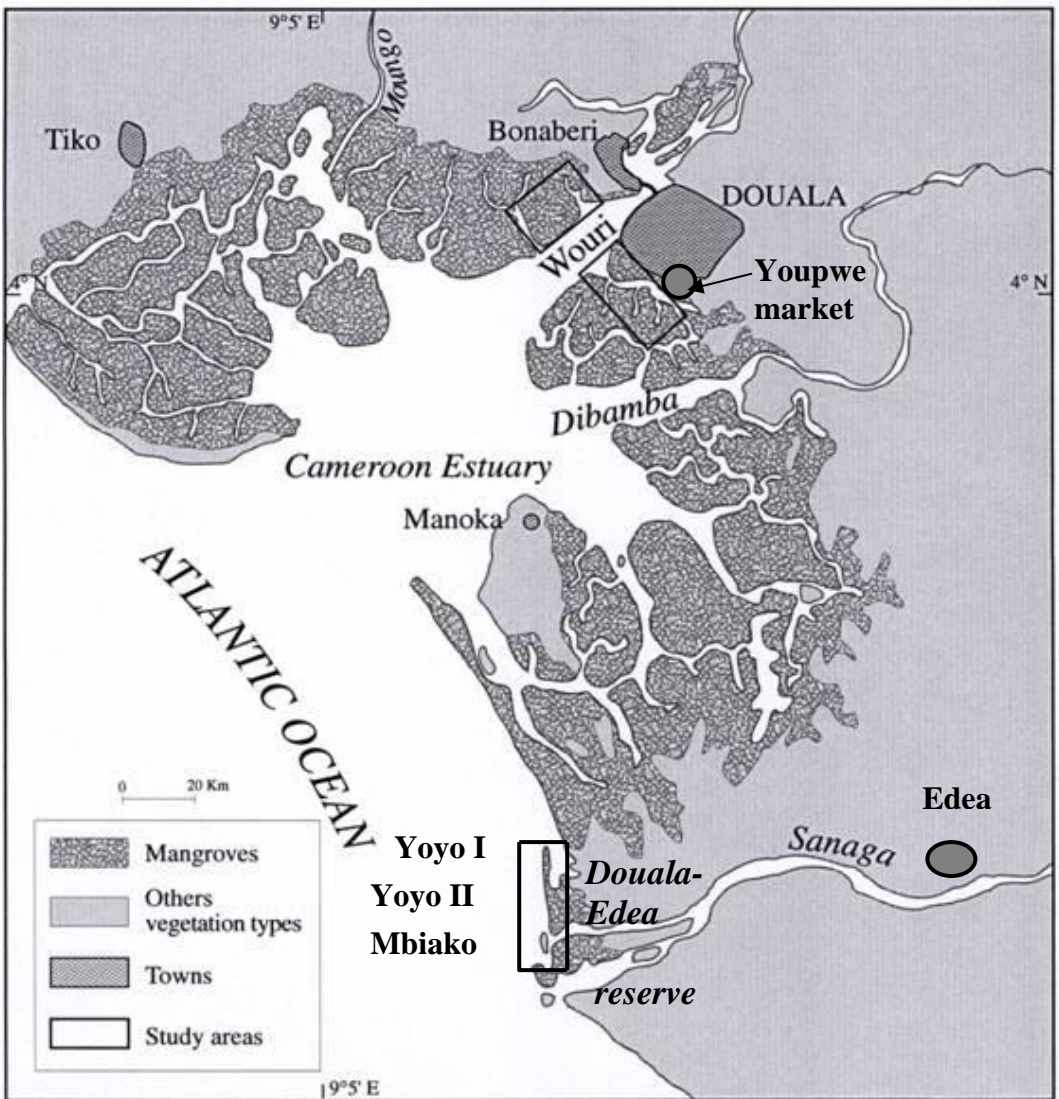

Supplement: MOESM1 [file 9627296]
